# Supplementary material
Source: PubMed Central journal article supplement (PMC2818036)
Supplement: NIHMS129400-supplement-01.pdf [file NIHMS129400-supplement-01.pdf]

Online Table. Genetic polymorphisms and their association with mammographic density.

| Gene                                | Polymorphism           | Chromosomal region | Amino acid change     | rsID     | Gene product function                                                                                                                                          | Influence of polymorphism on enzyme                                            | % relative change* in mammographic density             | Homozygous variant carriers, n |
|-------------------------------------|------------------------|--------------------|-----------------------|----------|----------------------------------------------------------------------------------------------------------------------------------------------------------------|--------------------------------------------------------------------------------|--------------------------------------------------------|--------------------------------|
| <b>Steroid hormone biosynthesis</b> |                        |                    |                       |          |                                                                                                                                                                |                                                                                |                                                        |                                |
| <i>CYP17A1</i>                      | +27T>C                 | 10q24.3            |                       | 743572   | Mediates steroid 17 $\alpha$ -hydroxylase and 17,20-lyase activities to $\uparrow$ production of estrone, 17 $\beta$ -estradiol and testosterone <sup>98</sup> | Unlikely functional effect <sup>56</sup>                                       | +9.1% <sup>39</sup>                                    | 48 all women                   |
|                                     |                        |                    |                       |          |                                                                                                                                                                |                                                                                | -9.9% <sup>41</sup>                                    | 76 all women                   |
|                                     |                        |                    |                       |          |                                                                                                                                                                |                                                                                | -9.8% <sup>46</sup>                                    | 113 all women                  |
|                                     |                        |                    |                       |          |                                                                                                                                                                |                                                                                | +24.0 <sup>43</sup>                                    | 69 premenopausal               |
|                                     |                        |                    |                       |          |                                                                                                                                                                |                                                                                | P=0.7 <sup>43</sup>                                    | Postmenopausal N not stated    |
|                                     |                        |                    |                       |          |                                                                                                                                                                |                                                                                |                                                        |                                |
|                                     | -103G>T                |                    | Ser <sup>65</sup> Ser | 6163     |                                                                                                                                                                | Known?                                                                         | -1.4% <sup>53</sup>                                    | 221 non-PMH                    |
|                                     | -160C>T                |                    | His <sup>46</sup> His | 6162     |                                                                                                                                                                | Known?                                                                         | -4.2% <sup>53</sup>                                    | 469 non-PMH                    |
| <i>CYP19A1</i> (aromatase)          | (TTTA)n microsatellite | 15q21.1            |                       | N/A      | Converts testosterone to 17 $\beta$ -estradiol and androstenedione to estrone                                                                                  | May alter splice site <sup>68</sup> ; unlikely functional effect <sup>57</sup> | -6.6% with 10 repeat <sup>41</sup>                     | 7 all women                    |
|                                     |                        |                    |                       |          |                                                                                                                                                                |                                                                                | +9.1% with 12 repeat <sup>41</sup>                     | 24 all women                   |
|                                     |                        |                    |                       |          |                                                                                                                                                                |                                                                                | Lower MD with each copy of 8 repeat <sup>31</sup>      | All women N not stated         |
|                                     |                        |                    |                       |          |                                                                                                                                                                |                                                                                | Higher MD with each copy of 10 repeat <sup>31</sup>    | All women N not stated         |
|                                     |                        |                    |                       |          |                                                                                                                                                                |                                                                                |                                                        |                                |
|                                     |                        |                    |                       |          |                                                                                                                                                                |                                                                                |                                                        |                                |
|                                     |                        |                    |                       |          |                                                                                                                                                                |                                                                                |                                                        |                                |
|                                     | +268T>C                |                    |                       | 10046    |                                                                                                                                                                | Known?                                                                         | -0.8% <sup>40</sup>                                    | 120 all women                  |
|                                     |                        |                    |                       |          |                                                                                                                                                                |                                                                                | -13.6%*** <sup>53</sup>                                | 298 non-PMH                    |
|                                     |                        |                    |                       |          |                                                                                                                                                                |                                                                                | Higher MD with each copy of minor allele <sup>31</sup> | All women N not stated         |
|                                     | +27(TCT)+/-            |                    |                       | 11575899 |                                                                                                                                                                | In LD with (TTTA)n microsatellite <sup>71</sup>                                | +0.5% with insertion <sup>53</sup>                     | 231 non-PMH                    |
|                                     |                        |                    |                       |          |                                                                                                                                                                |                                                                                | -8.1% with deletion <sup>53</sup>                      | 90 non-PMH                     |
|                                     |                        |                    |                       |          |                                                                                                                                                                |                                                                                | Lower MD with deletion <sup>31</sup>                   | All women N not stated         |

|                                   |                                    |           |                        |                        |                                                                                                                                        |                                                                                                      |                                                                                                                                    |                                                      |
|-----------------------------------|------------------------------------|-----------|------------------------|------------------------|----------------------------------------------------------------------------------------------------------------------------------------|------------------------------------------------------------------------------------------------------|------------------------------------------------------------------------------------------------------------------------------------|------------------------------------------------------|
|                                   | 17 other tagSNPs                   |           |                        | Refer to <sup>31</sup> |                                                                                                                                        | Known?                                                                                               | All P > 0.1 with each copy of minor allele <sup>31</sup>                                                                           | All women N not stated                               |
| <i>HSD3β1</i>                     | -429A>C                            | 1p13.1    | Asn <sup>367</sup> Thr | 1047303                | Catalyzes oxidation and isomerization of 3β-hydroxysteroid precursors into ketosteroids (progesterone, androgens)                      | Known?                                                                                               | -0.8% <sup>39</sup>                                                                                                                | 27 all women<br>23 Caucasians<br>4 African Americans |
|                                   |                                    |           |                        |                        |                                                                                                                                        |                                                                                                      | -13.6%** <sup>39</sup><br>+59.9%** <sup>39</sup><br>-9.9%** <sup>50</sup><br>-12.2%*** <sup>50</sup><br>Not reported <sup>50</sup> |                                                      |
| <i>HSD17β1</i>                    | +220G>A                            | 17q11-q21 | Gly <sup>312</sup> Ser | 605059                 | Converts estrone to 17β-estradiol and androstene-dione to testosterone                                                                 | Creates <i>Bsp</i> UI site <sup>57</sup> ; unlikely functional effect <sup>73</sup>                  | +9.9% <sup>39</sup>                                                                                                                | 96 all women                                         |
| <i>SHBG</i>                       | -67G>A                             | 17p13-p12 |                        | 1799941                | Specific plasma transport protein for testosterone and 17β-estradiol                                                                   | Known?                                                                                               | +0.5% <sup>53</sup>                                                                                                                | 164 non-PMH                                          |
|                                   | +6G>A                              |           | Asp <sup>356</sup> Asn | 6259                   |                                                                                                                                        |                                                                                                      | Creates an additional consensus site for N-glycosylation <sup>99</sup> that ↑ protein half-life <sup>100</sup> ; may ↑ SHBG        | +23.0% <sup>53</sup>                                 |
| <b>Steroid hormone metabolism</b> |                                    |           |                        |                        |                                                                                                                                        |                                                                                                      |                                                                                                                                    |                                                      |
| <i>CYP1A1</i>                     | +131A>G (also known as <i>m2</i> ) | 15q22-q24 | Ile <sup>462</sup> Val | 1048943                | Catalyzes estrone and 17β-estradiol preferentially to 2-OH catechol metabolites with lower activity for 4-OH metabolites <sup>86</sup> | Inconsistent: studies suggest ↑ enzyme activity <sup>84</sup> and increased expression <sup>82</sup> | Not reported <sup>41</sup>                                                                                                         | All women N not stated                               |
|                                   | T>C (also known as <i>m1</i> )     |           |                        |                        |                                                                                                                                        |                                                                                                      | 4646903                                                                                                                            |                                                      |
| <i>CYP1A2</i>                     | -154A>C (also known as CYP1A1*1F)  | 15q24     |                        | 762551                 | Catalyzes estrone and 17β-estradiol preferentially to 2-OH catechol metabolites with                                                   | ↑ inducibility; may ↓ bioactive estrogens <sup>82</sup>                                              | -16.0%*** <sup>46</sup>                                                                                                            | 23 all women<br>16 premenopausal<br>18 cases         |
|                                   |                                    |           |                        |                        |                                                                                                                                        |                                                                                                      | -24.9%*** <sup>46</sup><br>+2.9% <sup>38</sup>                                                                                     |                                                      |

|                      |                        |          |                        |         |                                                                                                                                                 |                                                                                                                |                                    |                             |
|----------------------|------------------------|----------|------------------------|---------|-------------------------------------------------------------------------------------------------------------------------------------------------|----------------------------------------------------------------------------------------------------------------|------------------------------------|-----------------------------|
|                      |                        |          |                        |         | lower activity for 4-OH metabolites <sup>86</sup>                                                                                               |                                                                                                                | +39.7%** <sup>38</sup>             | 18 controls                 |
| <i>CYP1B1</i>        | +251G>C                | 2p21     | Val <sup>432</sup> Leu | 1056836 | Catalyzes estrone and 17β-estradiol preferentially to 4-OH catechol metabolites with lower activity for 2-OH catechol metabolites <sup>85</sup> | ↑ enzyme activity; may ↓ bioactive estrogens and ↑ potentially carcinogenic 4-OH metabolites <sup>85, 86</sup> | -3.2% <sup>41</sup>                | 148 all women               |
|                      |                        |          |                        |         |                                                                                                                                                 |                                                                                                                | -25.8%** <sup>40</sup>             | 47 cPMH                     |
|                      |                        |          |                        |         |                                                                                                                                                 |                                                                                                                | +7.4% <sup>46</sup>                | 32 all women                |
|                      |                        |          |                        |         |                                                                                                                                                 |                                                                                                                | -23.4% <sup>37</sup>               | 37 ePMH                     |
|                      |                        |          |                        |         |                                                                                                                                                 |                                                                                                                | +110%** <sup>37</sup>              | 13 epPMH                    |
| +143C>G              |                        |          | Arg <sup>48</sup> Gly  | 10012   |                                                                                                                                                 | Inconsistent: ↑ expression or no effect on enzyme activity (reviewed in <sup>101</sup> )                       | -3.8% <sup>53</sup>                | 237 non-PMH                 |
|                      |                        |          |                        |         |                                                                                                                                                 |                                                                                                                | -4.4% <sup>53</sup>                | 102 non-PMH                 |
| +356G>T              |                        |          | Ala <sup>119</sup> Pro | 1056827 |                                                                                                                                                 | Known?                                                                                                         | -3.8% <sup>53</sup>                | 273 non-PMH                 |
| <i>COMT</i>          | -12G>A                 | 22q11.21 | Val <sup>158</sup> Met | 4680    | Methylates and inactivates 2- and 4-OH catechol estradiol and catechol estrone <sup>58</sup>                                                    | ↓ enzyme activity; may ↑ catechol estrogen metabolites <sup>58</sup>                                           | +4.5% <sup>39</sup>                | 82 all women                |
|                      |                        |          |                        |         |                                                                                                                                                 |                                                                                                                | +34.7%** <sup>39</sup>             | 19 cPMH                     |
|                      |                        |          |                        |         |                                                                                                                                                 |                                                                                                                | -5.8% <sup>41</sup>                | 149 all women               |
|                      |                        |          |                        |         |                                                                                                                                                 |                                                                                                                | -23.3%** <sup>41</sup>             | 63 n/pPMH                   |
|                      |                        |          |                        |         |                                                                                                                                                 |                                                                                                                | -15.0%** <sup>46</sup>             | 58 all women                |
|                      |                        |          |                        |         |                                                                                                                                                 |                                                                                                                | -20.7%** <sup>46</sup>             | 46 premenopausal            |
|                      |                        |          |                        |         |                                                                                                                                                 |                                                                                                                | -40.0%** <sup>42</sup>             | 38 premenopausal            |
|                      |                        |          |                        |         |                                                                                                                                                 |                                                                                                                | P = 0.76 <sup>42</sup>             | Postmenopausal N not stated |
|                      |                        |          |                        |         |                                                                                                                                                 |                                                                                                                | +62% <sup>37</sup>                 | 25 ePMH                     |
|                      |                        |          |                        |         |                                                                                                                                                 |                                                                                                                | +22.5% <sup>36</sup>               | 3 epPMH                     |
|                      |                        |          |                        |         |                                                                                                                                                 |                                                                                                                | +2.0% <sup>53</sup>                | 329 non-PMH                 |
|                      |                        |          |                        |         |                                                                                                                                                 |                                                                                                                | -3.5% <sup>38</sup>                | 42 cases                    |
|                      |                        |          |                        |         |                                                                                                                                                 |                                                                                                                | +6.3% <sup>38</sup>                | 47 controls                 |
| +14.2% <sup>50</sup> | All women N not stated |          |                        |         |                                                                                                                                                 |                                                                                                                |                                    |                             |
|                      |                        |          |                        |         |                                                                                                                                                 | P > 0.1 <sup>50</sup>                                                                                          | Pre or postmenopausal N not stated |                             |
| -98A>G               |                        |          |                        | 6269    |                                                                                                                                                 | Known?                                                                                                         | -10.9% <sup>53</sup>               | 202 non-PMH                 |
| -104C>T              |                        |          | His <sup>62</sup> His  | 4633    |                                                                                                                                                 | Known?                                                                                                         | +5.2% <sup>53</sup>                | 340 non-PMH                 |

|                                                    |                                                                     |           |                                                                            |                    |                                                                                                                                                                     |                                                                                                   |                                                                                                            |                                                        |  |
|----------------------------------------------------|---------------------------------------------------------------------|-----------|----------------------------------------------------------------------------|--------------------|---------------------------------------------------------------------------------------------------------------------------------------------------------------------|---------------------------------------------------------------------------------------------------|------------------------------------------------------------------------------------------------------------|--------------------------------------------------------|--|
|                                                    | -76C>G<br>+701A>G                                                   |           | Leu <sup>136</sup> Leu                                                     | 4818<br>737865     |                                                                                                                                                                     | Known?<br>Alters DNA protein binding; Up-regulates membrane-bound COMT expression <sup>55</sup>   | -12.8% <sup>53</sup><br>Lower MD with each copy of minor allele*** <sup>55</sup><br>P = 0.88 <sup>55</sup> | 187 non-PMH<br>402 postmenopausal<br>136 premenopausal |  |
| <i>UGT1A1</i>                                      | (TA) <sub>n</sub> TAA repeat                                        | 2q37      |                                                                            | N/A                | Glucuronidation of 17β-estradiol (with less affinity for estrone), 2-OH and 4-OH catechol estradiol and 2-OH and 4-OH catechol estrone for excretion <sup>102</sup> | ↓ promoter activity with increasing <i>n</i> repeats; may ↓ glucuronidation <sup>102</sup>        | -0.8% <sup>41</sup>                                                                                        | 51 all women                                           |  |
|                                                    |                                                                     |           |                                                                            |                    |                                                                                                                                                                     |                                                                                                   | +32%*** <sup>41</sup><br>+56.8%*** <sup>41</sup>                                                           | 31 postmenopausal<br>12 cPMH                           |  |
|                                                    |                                                                     |           |                                                                            |                    |                                                                                                                                                                     |                                                                                                   | -22.8% <sup>37</sup><br>-23.9% <sup>36</sup>                                                               | 14 ePMH<br>3 epPMH                                     |  |
| <i>AKR1C4</i>                                      | +931C>G                                                             | 10p15-p14 | Leu <sup>311</sup> Val <sup>103</sup>                                      | 17134592           | 3α-hydroxylation of ketosteroids to yield inactive metabolites for conjugation and elimination <sup>104</sup>                                                       | ↓ enzyme activity by 66-80%; may ↑ progesterone or androgen levels <sup>103</sup>                 | +27.9% for heterozygotes <sup>36</sup>                                                                     | 25 ePMH                                                |  |
|                                                    |                                                                     |           |                                                                            |                    |                                                                                                                                                                     |                                                                                                   | +632%*** <sup>37</sup>                                                                                     | 1 epPMH                                                |  |
| <b>Nuclear receptors and transcription factors</b> |                                                                     |           |                                                                            |                    |                                                                                                                                                                     |                                                                                                   |                                                                                                            |                                                        |  |
| <i>ESR1</i>                                        | -351A>G<br>(also known as Xba I, where A = x allele; G = X allele)  | 6q25.1    |                                                                            | 9340799            | Binds 17β-estradiol and acts as a transcription factor <sup>105</sup>                                                                                               | Unlikely <sup>57</sup>                                                                            | -2.0% with XX genotype <sup>53</sup>                                                                       | 280 non-PMH                                            |  |
|                                                    |                                                                     |           |                                                                            |                    |                                                                                                                                                                     |                                                                                                   | +13.8% with xx genotype*** <sup>47</sup>                                                                   | 71 non-PMH                                             |  |
|                                                    | -397C>T<br>(also known as Pvu II, where C = P allele; T = p allele) |           |                                                                            |                    | 2234693                                                                                                                                                             | Unlikely <sup>60</sup>                                                                            | +9.4% with pp genotype*** <sup>47</sup>                                                                    | 155 non-PMH                                            |  |
|                                                    |                                                                     |           |                                                                            |                    |                                                                                                                                                                     |                                                                                                   | Slower decline with x allele*** <sup>52</sup>                                                              | 634 cPMH                                               |  |
| <i>PGR</i>                                         | +331G>A                                                             | 11q22-q23 |                                                                            | N/A                | Nuclear receptor; trans-activates progesterone-responsive genes                                                                                                     | Creates a unique transcription start site; favours ↑ transcription of PGR β isoform <sup>64</sup> | Slower decline with GG genotype*** <sup>52</sup>                                                           | 623 cPMH                                               |  |
|                                                    | <i>PROGINS</i> :<br>-48C>T<br>+72G>T                                |           | His <sup>770</sup> His<br>Val <sup>660</sup> Leu<br>Alu insertion sequence | 1042839<br>1042838 |                                                                                                                                                                     | Loss of ligand binding and transcriptional activity <sup>65</sup>                                 | No difference in density decline by genotype <sup>52</sup>                                                 | 703 cPMH                                               |  |

|                                                                                               |                       |            |                        |         |                                                                                                                           |                                                                                                                                   |                                                                                                     |                                                                             |                                                         |
|-----------------------------------------------------------------------------------------------|-----------------------|------------|------------------------|---------|---------------------------------------------------------------------------------------------------------------------------|-----------------------------------------------------------------------------------------------------------------------------------|-----------------------------------------------------------------------------------------------------|-----------------------------------------------------------------------------|---------------------------------------------------------|
|                                                                                               | +72G>T                |            | Val <sup>660</sup> Leu | 1042838 |                                                                                                                           | Known?                                                                                                                            | +28.4% <sup>33</sup>                                                                                | 30 non-PMH                                                                  |                                                         |
| <i>AR</i>                                                                                     | (CAG)n repeats        | Xq11.2-q12 |                        | N/A     | Binds testosterone (androgens); transactivates androgen-responsive genes <sup>78</sup>                                    | AR alleles containing longer CAG repeat lengths are less active <sup>76, 77</sup>                                                 | -2.5% with long repeat allele <sup>41</sup>                                                         | 116 all women                                                               |                                                         |
|                                                                                               |                       |            |                        |         |                                                                                                                           |                                                                                                                                   | +2.3% with long repeat allele <sup>40</sup><br>+61.1% with long repeat allele** <sup>40</sup>       | 145 all women<br>27 epPMH                                                   |                                                         |
| <i>AIB1</i>                                                                                   | (CAG)n repeats        | 20q12      |                        | N/A     | A steroid receptor coactivator that facilitates transcription of target gene by the estrogen receptor <sup>106, 107</sup> | ↑ poly-glutamate length may decrease AIB1 stability <sup>108</sup>                                                                | +8.3% with short repeat allele <sup>41</sup><br><br>+20.3% with short repeat allele** <sup>41</sup> | 125 all women<br><br>91 postmenopausal                                      |                                                         |
| <b>Cell proliferation and growth</b>                                                          |                       |            |                        |         |                                                                                                                           |                                                                                                                                   |                                                                                                     |                                                                             |                                                         |
| <i>IGF-1</i>                                                                                  | (CA)n repeat          | 12q22-q23  |                        | N/A     | Encodes peptide growth hormones that promote cellular proliferation                                                       | Unknown; ≥19 repeats may ↓ promoter activity or be in LD with an unmeasured polymorphism; may ↓ serum IGF-1 levels <sup>109</sup> | +0.4% with 19 CA repeat allele <sup>45</sup>                                                        | All women N not stated                                                      |                                                         |
|                                                                                               | 8470 bp 3' of STP G>A |            |                        | 2946834 |                                                                                                                           |                                                                                                                                   | Known?                                                                                              | -17.7%** <sup>30</sup>                                                      | 117 all women                                           |
|                                                                                               |                       |            |                        |         |                                                                                                                           |                                                                                                                                   |                                                                                                     | Not significant by menopausal status <sup>30</sup><br>+6.5%** <sup>32</sup> | Pre or postmenopausal N not stated<br>192 premenopausal |
|                                                                                               | -178C>G               |            |                        | 1520220 |                                                                                                                           |                                                                                                                                   | Known?                                                                                              | -29.7%** <sup>30</sup>                                                      | 36 all women                                            |
|                                                                                               |                       |            |                        |         |                                                                                                                           |                                                                                                                                   |                                                                                                     | Not significant by menopausal status <sup>30</sup>                          | Pre or postmenopausal N not stated                      |
|                                                                                               |                       |            |                        |         |                                                                                                                           |                                                                                                                                   |                                                                                                     | +1.6% <sup>32</sup><br>+30.9%** <sup>54</sup>                               | 58 premenopausal<br>18 premenopausal                    |
|                                                                                               | -17526T>C             |            |                        | 7965399 |                                                                                                                           |                                                                                                                                   | Known?                                                                                              | -27.9% <sup>30</sup>                                                        | 2 all women                                             |
| Not significant by menopausal status <sup>30</sup><br>-0.9% for TC/CC genotypes <sup>32</sup> |                       |            |                        |         | Pre or postmenopausal N not stated<br>155 premenopausal                                                                   |                                                                                                                                   |                                                                                                     |                                                                             |                                                         |
| +4996C>A                                                                                      |                       |            | 1019731                | Known?  | -3.3% <sup>30</sup><br>Not significant by menopausal status <sup>30</sup>                                                 | 23 all women<br>Pre or postmenopausal N not stated                                                                                |                                                                                                     |                                                                             |                                                         |

|                |                  |          |                         |                        |                                                                                                                 |                                                               |                                                                                                                          |                                                                                               |
|----------------|------------------|----------|-------------------------|------------------------|-----------------------------------------------------------------------------------------------------------------|---------------------------------------------------------------|--------------------------------------------------------------------------------------------------------------------------|-----------------------------------------------------------------------------------------------|
|                | -26989G>A        |          |                         | 2373722                |                                                                                                                 | Known?                                                        | +8.6% <sup>32</sup><br>-26.6%*** <sup>30</sup>                                                                           | 36 premenopausal<br>7 all women                                                               |
|                | 8 other tagSNPs  |          |                         | Refer to <sup>30</sup> |                                                                                                                 |                                                               | Not significant by menopausal status <sup>30</sup>                                                                       | Pre or postmenopausal N not stated                                                            |
|                | +1830T>C         |          |                         | 6220                   |                                                                                                                 | Known?                                                        | Not significant <sup>30</sup>                                                                                            | N varies from 19-270 all women                                                                |
|                | A>G              |          |                         | 5742612                |                                                                                                                 | Known?                                                        | +6.7%*** <sup>32</sup><br>+23.3%*** <sup>54</sup>                                                                        | 143 premenopausal<br>38 premenopausal                                                         |
|                | C>A              |          |                         | 1549593                |                                                                                                                 | Known?                                                        | +41.2% <sup>54</sup>                                                                                                     | 2 premenopausal                                                                               |
|                | A>G              |          |                         | 7956547                |                                                                                                                 | Known?                                                        | -5.9% <sup>54</sup><br>+11.0% <sup>30</sup><br>Not significant by menopausal status <sup>30</sup>                        | 11 premenopausal<br>20 all women<br>Pre or postmenopausal N not stated                        |
|                | T>C              |          |                         | 7136446                |                                                                                                                 | Known?                                                        | +7.6%*** <sup>32</sup>                                                                                                   | 110 premenopausal                                                                             |
|                | 10 other tagSNPs |          |                         | Refer to <sup>32</sup> |                                                                                                                 | Known?                                                        | -7.8% for TT <sup>32</sup><br>-8.2% for TC <sup>32</sup><br>-4.6% for CC** <sup>32</sup>                                 | 256 pre to postmenopause<br>289 pre to postmenopause<br>99 pre to postmenopause               |
| <i>IGFIR</i>   | G>A              | 15q26.3  | Glu <sup>1013</sup> Glu | 2229765                | Encodes IGF-I receptor                                                                                          | Known?                                                        | Not significant <sup>32</sup>                                                                                            | N varies from 20-300 premenopausal                                                            |
| <i>IGFBP-1</i> | -574G>A          | 7p13-p12 |                         | 1065780                | Encodes circulatory binding proteins of IGF-1; sequesters IGF-1 from interacting with its cell-surface receptor | No functional impact <sup>110</sup>                           | +8.7% <sup>54</sup>                                                                                                      | 148 premenopausal                                                                             |
|                | 4 other tagSNPs  |          |                         | Refer to <sup>30</sup> |                                                                                                                 | Known?                                                        | +14.5%*** <sup>30</sup><br>Not significant by menopausal status <sup>30</sup>                                            | 158 all women<br>Pre or postmenopausal N not stated                                           |
| <i>IGFBP-3</i> | -202C>A          | 7p13-p12 |                         | 2854744                |                                                                                                                 | Known?                                                        | Not significant <sup>30</sup>                                                                                            | N varies from 1-120 all women                                                                 |
|                |                  |          |                         |                        |                                                                                                                 | ↑ promoter activity; may ↑ serum IGFBP-3 levels <sup>67</sup> | +20.0%*** <sup>45</sup><br>+26.2%*** <sup>45</sup><br>+14.9% <sup>48</sup><br>+4.0% <sup>48</sup><br>+8.8% <sup>50</sup> | All women N not stated<br>Premenopausal N not stated<br>41 premenopausal<br>39 postmenopausal |
|                |                  |          |                         |                        |                                                                                                                 |                                                               | P > 0.1 <sup>50</sup>                                                                                                    | All women N not stated<br>Pre or postmenopausal N not stated                                  |

|               |                 |         |                        |                        |                                                                                                       |                                                                                                                            |                                                                           |                                                     |
|---------------|-----------------|---------|------------------------|------------------------|-------------------------------------------------------------------------------------------------------|----------------------------------------------------------------------------------------------------------------------------|---------------------------------------------------------------------------|-----------------------------------------------------|
|               |                 |         |                        |                        |                                                                                                       |                                                                                                                            | -0.4% <sup>30</sup><br>Not significant by menopausal status <sup>30</sup> | 202 all women<br>Pre or postmenopausal N not stated |
|               | G>A             |         |                        | 2132572                |                                                                                                       | Known?                                                                                                                     | -2.3% <sup>54</sup>                                                       | 188 premenopausal                                   |
|               | G>C             |         |                        | 2471551                |                                                                                                       | Known?                                                                                                                     | +1.9% <sup>54</sup>                                                       | 39 premenopausal                                    |
|               | C>T             |         |                        | 3110697                |                                                                                                       | Known?                                                                                                                     | +2.9% <sup>54</sup>                                                       | 27 premenopausal                                    |
|               |                 |         |                        |                        |                                                                                                       | Known?                                                                                                                     | +3.4% <sup>54</sup>                                                       | 114 premenopausal                                   |
|               |                 |         |                        |                        |                                                                                                       |                                                                                                                            | -6.4% <sup>30</sup><br>Not significant by menopausal status <sup>30</sup> | 195 all women<br>Pre or postmenopausal N not stated |
|               | 7 other tagSNPs |         |                        | Refer to <sup>30</sup> |                                                                                                       | Known?                                                                                                                     | Not significant <sup>30</sup>                                             | N varies from 35-148 all women                      |
| <i>IRS1</i>   | G>A             | 2q36    | Gly <sup>971</sup> Arg | 1801278                | Encodes insulin receptor substrate 1, a downstream signaling molecule of IGF1R                        | Impairs insulin-stimulated signaling <sup>111</sup>                                                                        | +29.4% <sup>54</sup>                                                      | 2 premenopausal                                     |
| <i>PIK3CB</i> | Promoter T>C    | 3q22.3  |                        | 361072                 | Encodes phosphoinositide-3-kinase, catalytic, $\beta$ polypeptide, a major effector of insulin action | Impairs PIK3CB expression; may promote insulin resistance <sup>112</sup>                                                   | -9.9%** <sup>54</sup>                                                     | 161 premenopausal                                   |
| <i>GHI</i>    | -75G>A          | 17q24.2 | Val <sup>26</sup> Val  | 6171 <sup>113</sup>    | Encodes growth hormone                                                                                | May $\downarrow$ promoter activity or be in LD with an unmeasured polymorphism; may $\downarrow$ GH1 levels <sup>114</sup> | +13.1%** <sup>44</sup>                                                    | 280 all women                                       |
|               | -57G>T          |         | Gly <sup>30</sup> Gly  | 2665802 <sup>113</sup> |                                                                                                       |                                                                                                                            | +20.6%** <sup>44</sup>                                                    | 137 premenopausal                                   |
|               |                 |         |                        |                        |                                                                                                       |                                                                                                                            | +18.7%** <sup>44</sup>                                                    | 57 all women                                        |
|               |                 |         |                        |                        |                                                                                                       |                                                                                                                            | +22.5%** <sup>44</sup>                                                    | 25 premenopausal                                    |
| <i>GHRHR</i>  | +169G>A         | 7p14    | Ala <sup>57</sup> Thr  | 4988496 <sup>113</sup> | G-protein-linked receptor expressed in the pituitary; binds GHRH to $\uparrow$ GH production          | $\uparrow$ sensitivity of GHRHR to bind GHRH; may $\uparrow$ GH secretion <sup>115</sup>                                   | +0.7% with $\geq 1$ A allele <sup>44</sup>                                | 43 all women                                        |
| <i>HER2</i>   | A>G             | 17q21.1 | Val <sup>655</sup> Ile | 1801200                | Encodes a epidermal growth factor (EGF)                                                               | Known?                                                                                                                     | -8.4% <sup>30</sup>                                                       | All women N not stated                              |

|                                                 |                                                 |               |                        |          |                                                                                                                   |                                                                     |                                                                                                                                                              |                                                              |
|-------------------------------------------------|-------------------------------------------------|---------------|------------------------|----------|-------------------------------------------------------------------------------------------------------------------|---------------------------------------------------------------------|--------------------------------------------------------------------------------------------------------------------------------------------------------------|--------------------------------------------------------------|
|                                                 |                                                 |               |                        |          | receptor family member; enhances kinase-mediated (mitogen) signaling pathways                                     |                                                                     | P > 0.1 <sup>50</sup>                                                                                                                                        | Pre or postmenopausal N not stated                           |
| <b>Tumor suppressors</b>                        |                                                 |               |                        |          |                                                                                                                   |                                                                     |                                                                                                                                                              |                                                              |
| <i>BRCA1/BRCA2</i>                              | >750 protein-truncating mutations <sup>80</sup> | 17q21/13q12.3 |                        | N/A      | Tumor suppressors                                                                                                 | Known?                                                              | No difference in density between mutation positive and negative cases <sup>33, 36, 49</sup><br>Higher density in mutation positive cases** <sup>34, 35</sup> | N varies from 9 to 206                                       |
| <b>DNA repair</b>                               |                                                 |               |                        |          |                                                                                                                   |                                                                     |                                                                                                                                                              |                                                              |
| <i>XPD</i>                                      | A>C                                             | 19q13.3       | Lys <sup>751</sup> Gln | 17359310 | Nucleotide excision repair cross-complementing 2 gene involved in DNA repair                                      | May ↑ repair of X-ray induced DNA damage <sup>116</sup>             | +1.3% <sup>50</sup><br>P > 0.1 <sup>50</sup>                                                                                                                 | All women N not stated<br>Pre or postmenopausal N not stated |
| <i>XRCC3</i>                                    | T>C                                             | 14q32.3       | Thr <sup>241</sup> Met | 861539   | X-Ray Repair Cross-Complementing 3 gene involved in DNA homologous recombinational repair                         | Predicted to abolish a putative phosphorylation site <sup>117</sup> | -1.6% <sup>50</sup><br>P > 0.1 <sup>50</sup>                                                                                                                 | All women N not stated<br>Pre or postmenopausal N not stated |
| <b>Genome Wide Association Study Candidates</b> |                                                 |               |                        |          |                                                                                                                   |                                                                     |                                                                                                                                                              |                                                              |
| ?                                               | A>C                                             | 5q            |                        | 889312   |                                                                                                                   | Known?                                                              | -18.2% <sup>51</sup>                                                                                                                                         | 49 all women                                                 |
| <i>FGFR2</i>                                    | T>C                                             | 10q26         |                        | 2981582  | Encodes fibroblast growth factor receptor 2 that interacts with FGF to influence mitogenesis and differentiation. | Known?                                                              | No change <sup>51</sup>                                                                                                                                      | 76 all women                                                 |
| ?                                               | T>C                                             | 16q           |                        | 3803662  |                                                                                                                   | Known?                                                              | +5.5% <sup>51</sup>                                                                                                                                          | 58 all women                                                 |
| <i>LSP1</i>                                     | T>C                                             | 11p15.5       |                        | 3817198  | Encodes lymphocyte-specific protein 1; may regulate neutrophil motility,                                          | Known?                                                              | +11.2% <sup>51</sup>                                                                                                                                         | 54 all women                                                 |



|   |     |    |  |          |                                                                        |        |                      |               |
|---|-----|----|--|----------|------------------------------------------------------------------------|--------|----------------------|---------------|
|   |     |    |  |          | adhesion to fibrinogen matrix proteins, and transendothelial migration |        |                      |               |
| ? | A>G | 8q |  | 13281615 |                                                                        | Known? | +11.9% <sup>§1</sup> | 116 all women |
| ? | A>G | 2q |  | 13387042 |                                                                        | Known? | -0.8% <sup>§1</sup>  | 109 all women |

cPMH = current postmenopausal hormone users; p/nPMH = past or never; ePMH = estrogen only; epPMH = estrogen and progestin.

\* Comparing relative percent change in mammographic density (MD) between homozygous variant (hv) genotype and homozygous wildtype (hwt) genotype using the formula:  $(MD_{hv} - MD_{hwt} / MD_{hwt}) * 100$ . Those associations that were significant at  $P < 0.05^{**}$  or  $0.05 \leq P \leq 0.1^{***}$  are indicated.
